# Supplementary material for: Changes in risk perceptions during the 2014 Ebola virus disease epidemic: results of two consecutive surveys among the general population in Lower Saxony, Germany
Source: PubMed Central journal article supplement (PMC5952518; doi:10.1186/s12889-018-5543-1), 2018-05-15
Supplement: 12889_2018_5543_MOESM2_ESM.pdf [file 12889_2018_5543_MOESM2_ESM.pdf]

Article title:

**Changes in risk perceptions during the 2014 Ebola virus disease epidemic: results of two consecutive surveys among the general population in Lower Saxony, Germany**

Authors:

Julie Obenauer; Nicole Rübsamen; Ekaterine Garsevanidze; André Karch; Rafael T. Mikolajczyk

Journal:

BMC Public Health

**Additional file 2 – Differences in 2014's risk perception between individuals who responded to both surveys and individuals who responded to the first survey only**

|                                                                                                                                                 | First survey completed (N=974)<br>n (%) | Second survey completed |                      | p-value |
|-------------------------------------------------------------------------------------------------------------------------------------------------|-----------------------------------------|-------------------------|----------------------|---------|
|                                                                                                                                                 |                                         | No (N=354)<br>n (%)     | Yes (N=620)<br>n (%) |         |
| <b>Affective response</b>                                                                                                                       |                                         |                         |                      |         |
| <b>Percentage of participants who are worried...</b>                                                                                            |                                         |                         |                      |         |
| ...about EVD.                                                                                                                                   | 281 (28.9)                              | 112 (31.6)              | 169 (27.3)           | 0.17    |
| ...that in the next three months people might arrive in Germany who are identified as infected persons after their entry.                       | 736 (76.0)                              | 261 (74.4)              | 475 (77.0)           | 0.40    |
| ...that individual persons might be infected with the Ebola virus in Germany during the next six months.                                        | 579 (59.9)                              | 223 (63.7)              | 356 (57.7)           | 0.077   |
| ...that in the next six months Ebola could spread in the general population of Germany similar to how it is spreading currently in West Africa. | 33 (3.4)                                | 13 (3.7)                | 20 (3.2)             | 0.83    |
| <b>Knowledge score</b> , median (interquartile range)                                                                                           | 7.0 (6.0, 9.0)                          | 7.0 (5.0, 9.0)          | 7.0 (6.0, 9.0)       | 0.0085  |
| <b>Cognitive response: likelihood of infection</b>                                                                                              |                                         |                         |                      |         |
| <b>Percentage of participants who think that they have a personal risk of acquiring Ebola...</b>                                                |                                         |                         |                      |         |
| ...at work.                                                                                                                                     | 72 (8.6)                                | 24 (7.5)                | 48 (9.3)             | 0.46    |
| ... in public transport.                                                                                                                        | 156 (16.9)                              | 60 (17.9)               | 96 (16.4)            | 0.61    |
| ... in public places (school, childcare ...) or public events.                                                                                  | 171 (17.9)                              | 70 (20.2)               | 101 (16.6)           | 0.20    |
| ...at an airport in Germany.                                                                                                                    | 347 (37.4)                              | 125 (37.4)              | 222 (37.4)           | 1.00    |
| ...as a patient in a German hospital.                                                                                                           | 147 (15.3)                              | 56 (16.1)               | 91 (14.8)            | 0.66    |
| ...at a doctor's office in Germany.                                                                                                             | 158 (16.4)                              | 59 (16.9)               | 99 (16.2)            | 0.84    |
| ...during a travel to affected countries.                                                                                                       | 493 (73.1)                              | 190 (74.5)              | 303 (72.3)           | 0.59    |
| <b>Cognitive response: personal impact</b>                                                                                                      |                                         |                         |                      |         |
| <b>Percentage of participants who would...</b>                                                                                                  |                                         |                         |                      |         |
| ...avoid public events and crowded places.                                                                                                      | 149 (15.4)                              | 56 (16.0)               | 93 (15.1)            | 0.77    |
| ...avoid using public transport.                                                                                                                | 138 (14.3)                              | 47 (13.4)               | 91 (14.7)            | 0.64    |
| ...avoid physical contact with other people.                                                                                                    | 312 (32.3)                              | 103 (29.4)              | 209 (33.9)           | 0.17    |
| ...pay more attention to hygiene (e.g. wash hands more often).                                                                                  | 630 (65.1)                              | 219 (62.6)              | 411 (66.6)           | 0.23    |
| ...wear a face mask outside of my home.                                                                                                         | 12 (1.2)                                | 5 (1.4)                 | 7 (1.1)              | 0.93    |
| ...not want to be admitted to the same hospital.                                                                                                | 463 (47.9)                              | 159 (45.4)              | 304 (49.4)           | 0.27    |
| ...not visit friends admitted to the same hospital.                                                                                             | 254 (26.3)                              | 89 (25.4)               | 165 (26.8)           | 0.70    |

|                                                                                                                                                           | <b>First survey completed (N=974)<br/>n (%)</b> | <b>Second survey completed</b> |                              |                |
|-----------------------------------------------------------------------------------------------------------------------------------------------------------|-------------------------------------------------|--------------------------------|------------------------------|----------------|
|                                                                                                                                                           |                                                 | <b>No (N=354)<br/>n (%)</b>    | <b>Yes (N=620)<br/>n (%)</b> | <b>P-value</b> |
| <b>Cognitive response: coping efficacy</b>                                                                                                                |                                                 |                                |                              |                |
| <b>Percentage of participants who support specific measure to prevent the spread of EVD to Europe</b>                                                     |                                                 |                                |                              |                |
| Provide information on EVD for all travelers coming from affected areas and advice in case of developing symptoms                                         | 933 (97.0)                                      | 339 (96.6)                     | 594 (97.2)                   | 0.72           |
| Get personal information of all travelers coming from affected areas and control their health three weeks long                                            | 662 (68.8)                                      | 241 (68.7)                     | 421 (68.9)                   | 1.00           |
| Forbid return transport of Germans getting infected during assistance intervention in West Africa                                                         | 90 (9.3)                                        | 38 (10.8)                      | 52 (8.5)                     | 0.28           |
| Forbid bringing EVD patients for treatment to Germany                                                                                                     | 242 (25.3)                                      | 91 (26.1)                      | 151 (24.8)                   | 0.72           |
| Measure temperature of all travelers coming from affected countries when they arrive in Europe with subsequent quarantine for those with high temperature | 569 (59.7)                                      | 217 (62.0)                     | 352 (58.4)                   | 0.30           |
| Measure temperature of all travelers coming from affected countries when they leave Africa with subsequent quarantine for those with high temperature     | 519 (54.5)                                      | 197 (56.4)                     | 322 (53.3)                   | 0.38           |
| Mandatory quarantine for all volunteers returning from assistance intervention in West Africa                                                             | 359 (37.6)                                      | 126 (36.0)                     | 233 (38.5)                   | 0.48           |
| Visa ban for people from affected countries                                                                                                               | 164 (17.0)                                      | 60 (17.0)                      | 104 (16.9)                   | 1.00           |
| Forbid traveling from Germany to affected countries in Africa                                                                                             | 153 (15.9)                                      | 58 (16.5)                      | 95 (15.5)                    | 0.73           |
| Compulsory vaccination against Ebola for all inhabitants of affected countries as soon as a vaccine is available                                          | 828 (85.9)                                      | 297 (84.6)                     | 531 (86.6)                   | 0.44           |
